# Supplementary material for: Factors Influencing Somatic Embryo Maturation in Sugi (Japanese Cedar, Cryptomeria japonica (Thunb. ex L.f.) D. Don)
Source: MDPI journal article supplement (doi:10.3390/plants10050874), 2021-04-26
Supplement: s1 [file s1]

# Factors Influencing Somatic Embryo Maturation in Sugi [Japanese Cedar, *Cryptomeria japonica* (Thunb. ex L.f.) D. Don]

## Supplementary Materials

### Supplementary Tables

**Table S1.** Summary of the estimated parameters of the generalized linear model (GLM) of data from Table 1 [Effect of basal salts (BS) of medium on somatic embryo maturation efficiency of sugi embryogenic cell lines (ECLs)].

| Variables   | Estimated parameters | SE    | Z value | P value | Significance |
|-------------|----------------------|-------|---------|---------|--------------|
| (Intercept) | 5.615                | 0.234 | 23.973  | 0       | ***          |
| S-73        | -0.417               | 0.309 | -1.352  | 0.176   | ns           |
| S-100       | -0.363               | 0.309 | -1.178  | 0.239   | ns           |
| S-113       | -0.927               | 0.31  | -2.988  | 0.003   | **           |
| S-352       | -0.812               | 0.31  | -2.622  | 0.009   | **           |
| MS          | -4.198               | 0.401 | -10.481 | 0       | ***          |
| WP          | -0.894               | 0.31  | -2.881  | 0.004   | **           |
| B5          | -2.235               | 0.321 | -6.957  | 0       | ***          |
| plate2      | 0.271                | 0.149 | 1.823   | 0.068   | ns           |
| plate3      | 0.299                | 0.149 | 2.01    | 0.044   | *            |
| S-73:MS     | -0.359               | 0.632 | -0.568  | 0.57    | ns           |
| S-100:MS    | -0.291               | 0.619 | -0.47   | 0.638   | ns           |
| S-113:MS    | 0.169                | 0.631 | 0.269   | 0.788   | ns           |
| S-352:MS    | 0.31                 | 0.605 | 0.513   | 0.608   | ns           |
| S-73:WP     | -0.018               | 0.441 | -0.041  | 0.968   | ns           |
| S-100:WP    | -2.657               | 0.491 | -5.417  | 0       | ***          |
| S-113:WP    | -2.28                | 0.502 | -4.542  | 0       | ***          |
| S-352:WP    | -1.814               | 0.475 | -3.823  | 0       | ***          |
| S-73:B5     | -1.083               | 0.489 | -2.214  | 0.027   | *            |
| S-100:B5    | -0.858               | 0.479 | -1.792  | 0.073   | ns           |
| S-113:B5    | -0.434               | 0.485 | -0.896  | 0.37    | ns           |
| S-352:B5    | -0.38                | 0.479 | -0.794  | 0.427   | ns           |

\*\*\*,  $P < 0.001$ ; \*\*,  $P < 0.01$ ; \*,  $P < 0.05$ ; ns, not significant.

**Table S2.** Summary of the estimated parameters of the generalized linear model (GLM) of data from Table 3 [Effect of polyethylene glycol (PEG) concentration on somatic embryo maturation efficiency of sugi embryogenic cell lines (ECLs)].

| Variables         | Estimated parameters | SE    | Z value | P value | Significance |
|-------------------|----------------------|-------|---------|---------|--------------|
| (Intercept)       | 5.408                | 0.204 | 26.567  | 0       | ***          |
| S-100             | -0.312               | 0.275 | -1.133  | 0.257   | ns           |
| S-352             | -0.055               | 0.274 | -0.202  | 0.84    | ns           |
| T-1151            | 0.022                | 0.274 | 0.08    | 0.936   | ns           |
| T-158             | -0.339               | 0.275 | -1.232  | 0.218   | ns           |
| PEG 15%           | 0.913                | 0.272 | 3.352   | 0.001   | ***          |
| PEG 17.5%         | 1.069                | 0.272 | 3.925   | 0       | ***          |
| PEG 20%           | -1.792               | 0.288 | -6.23   | 0       | ***          |
| plate2            | -0.056               | 0.108 | -0.522  | 0.601   | ns           |
| plate3            | 0.014                | 0.108 | 0.128   | 0.898   | ns           |
| S-100: PEG 15%    | -0.227               | 0.387 | -0.588  | 0.556   | ns           |
| S-352: PEG 15%    | -0.272               | 0.386 | -0.706  | 0.48    | ns           |
| T-1151: PEG 15%   | -0.192               | 0.385 | -0.499  | 0.618   | ns           |
| T-158: PEG 15%    | -0.205               | 0.387 | -0.529  | 0.597   | ns           |
| S-100: PEG 17.5%  | 0.121                | 0.386 | 0.314   | 0.754   | ns           |
| S-352: PEG 17.5%  | -0.31                | 0.386 | -0.805  | 0.421   | ns           |
| T-1151: PEG 17.5% | 0.221                | 0.385 | 0.575   | 0.565   | ns           |
| T-158: PEG 17.5%  | 0.404                | 0.386 | 1.047   | 0.295   | ns           |
| S-100: PEG 20%    | -0.31                | 0.417 | -0.743  | 0.457   | ns           |
| S-352: PEG 20%    | 0.396                | 0.404 | 0.981   | 0.327   | ns           |
| T-1151: PEG 20%   | 0.448                | 0.402 | 1.112   | 0.266   | ns           |
| T-158: PEG 20%    | 0.522                | 0.406 | 1.288   | 0.198   | ns           |

\*\*\*,  $P < 0.001$ ; ns, not significant.

**Table S3.** Summary of the estimated parameters of the generalized linear model (GLM) of data from Table 5 [Effect of abscisic acid (ABA) concentration on somatic embryo maturation efficiency of sugi embryogenic cell lines (ECLs)].

| Variables               | Estimated parameters | SE    | Z value | P value | Significance |
|-------------------------|----------------------|-------|---------|---------|--------------|
| (Intercept)             | 3.055                | 0.25  | 12.195  | 0       | ***          |
| S-64                    | -2.255               | 0.518 | -4.351  | 0       | ***          |
| S-85                    | -2.081               | 0.492 | -4.232  | 0       | ***          |
| S-100                   | -0.805               | 0.374 | -2.15   | 0.032   | *            |
| S-113                   | -2.423               | 0.547 | -4.429  | 0       | ***          |
| S-352                   | -1.739               | 0.448 | -3.879  | 0       | ***          |
| T-1151                  | -0.866               | 0.378 | -2.293  | 0.022   | *            |
| ABA 100 $\mu$ M         | 3.025                | 0.319 | 9.493   | 0       | ***          |
| ABA 200 $\mu$ M         | 2.145                | 0.321 | 6.693   | 0       | ***          |
| ABA 50 $\mu$ M          | 2.322                | 0.32  | 7.256   | 0       | ***          |
| plate2                  | -0.194               | 0.106 | -1.835  | 0.067   | ns           |
| plate3                  | -0.155               | 0.105 | -1.468  | 0.142   | ns           |
| S-64: ABA 100 $\mu$ M   | 2.218                | 0.594 | 3.73    | 0       | ***          |
| S-85: ABA 100 $\mu$ M   | 1.658                | 0.572 | 2.899   | 0.004   | **           |
| S-100: ABA 100 $\mu$ M  | 0.759                | 0.474 | 1.601   | 0.109   | ns           |
| S-113: ABA 100 $\mu$ M  | 1.904                | 0.62  | 3.07    | 0.002   | **           |
| S-352: ABA 100 $\mu$ M  | 1.585                | 0.535 | 2.964   | 0.003   | **           |
| T-1151: ABA 100 $\mu$ M | 0.937                | 0.477 | 1.965   | 0.049   | *            |
| S-64: ABA 200 $\mu$ M   | 0.272                | 0.607 | 0.448   | 0.654   | ns           |
| S-85: ABA 200 $\mu$ M   | 2.822                | 0.573 | 4.929   | 0       | ***          |
| S-100: ABA 200 $\mu$ M  | 0.791                | 0.477 | 1.659   | 0.097   | ns           |
| S-113: ABA 200 $\mu$ M  | 1.693                | 0.623 | 2.716   | 0.007   | **           |
| S-352: ABA 200 $\mu$ M  | 0.673                | 0.54  | 1.245   | 0.213   | ns           |
| T-1151: ABA 200 $\mu$ M | 0.717                | 0.48  | 1.495   | 0.135   | ns           |
| S-64: ABA 50 $\mu$ M    | 2.562                | 0.596 | 4.302   | 0       | ***          |
| S-85: ABA 50 $\mu$ M    | 2.296                | 0.573 | 4.009   | 0       | ***          |
| S-100: ABA 50 $\mu$ M   | 1.414                | 0.475 | 2.975   | 0.003   | **           |
| S-113: ABA 50 $\mu$ M   | 0.761                | 0.627 | 1.213   | 0.225   | ns           |
| S-352: ABA 50 $\mu$ M   | 0.394                | 0.541 | 0.728   | 0.467   | ns           |
| T-1151: ABA 50 $\mu$ M  | 1.209                | 0.478 | 2.529   | 0.011   | *            |

\*\*\*,  $P < 0.001$ ; \*\*,  $P < 0.01$ ; \*,  $P < 0.05$ ; ns, not significant.

**Table S4.** Summary of the estimated parameters of the generalized linear model (GLM) of data from Table 7 [Effect of potassium chloride (KCl) supplementation on somatic embryo maturation efficiency of sugi embryogenic cell lines (ECLs)].

| Variables       | Estimated parameters | SE    | Z value | P value | Significance |
|-----------------|----------------------|-------|---------|---------|--------------|
| (Intercept)     | 5.94                 | 0.199 | 29.875  | 0       | ***          |
| S-85            | -0.261               | 0.248 | -1.051  | 0.293   | ns           |
| S-100           | -0.156               | 0.248 | -0.628  | 0.53    | ns           |
| S-182           | -0.662               | 0.249 | -2.66   | 0.008   | **           |
| S-352           | -0.252               | 0.248 | -1.015  | 0.31    | ns           |
| T-1151          | 0.172                | 0.248 | 0.694   | 0.488   | ns           |
| T-158           | 0.001                | 0.248 | 0.003   | 0.997   | ns           |
| KCl (+)         | 0.098                | 0.248 | 0.398   | 0.691   | ns           |
| plate2          | -0.012               | 0.148 | -0.083  | 0.934   | ns           |
| plate3          | 0.097                | 0.148 | 0.653   | 0.514   | ns           |
| plate4          | 0                    | 0.148 | -0.003  | 0.998   | ns           |
| plate5          | -0.046               | 0.148 | -0.308  | 0.758   | ns           |
| S-85: KCl (+)   | -0.42                | 0.351 | -1.196  | 0.232   | ns           |
| S-100: KCl (+)  | -0.149               | 0.351 | -0.426  | 0.67    | ns           |
| S-182: KCl (+)  | -0.058               | 0.352 | -0.164  | 0.869   | ns           |
| S-352: KCl (+)  | 0.034                | 0.351 | 0.098   | 0.922   | ns           |
| T-1151: KCl (+) | -0.325               | 0.35  | -0.928  | 0.353   | ns           |
| T-158: KCl (+)  | -0.072               | 0.35  | -0.204  | 0.838   | ns           |

\*\*\*,  $P < 0.001$ ; \*\*,  $P < 0.01$ ; ns, not significant.

**Table S5.** Summary of the estimated parameters of the generalized linear model (GLM) of data from Table 9 [Effect of amino acid (AA) concentration on somatic embryo maturation efficiency of sugi embryogenic cell lines (ECLs)].

| Variables     | Estimate parameters | SE    | Z value | P value | Significance |
|---------------|---------------------|-------|---------|---------|--------------|
| (Intercept)   | 3.734               | 0.238 | 15.657  | 0       | ***          |
| S-100         | -2.639              | 0.454 | -5.808  | 0       | ***          |
| S-113         | -1.84               | 0.381 | -4.827  | 0       | ***          |
| S-182         | -2.889              | 0.488 | -5.921  | 0       | ***          |
| S-352         | -2.89               | 0.488 | -5.921  | 0       | ***          |
| AA 1 X        | 2.063               | 0.31  | 6.648   | 0       | ***          |
| AA 2 X        | 2.379               | 0.31  | 7.678   | 0       | ***          |
| AA 3 X        | 1.984               | 0.31  | 6.393   | 0       | ***          |
| plate2        | 0.005               | 0.126 | 0.036   | 0.971   | ns           |
| plate3        | 0.004               | 0.126 | 0.032   | 0.975   | ns           |
| S-100: AA 1 X | 1.892               | 0.545 | 3.472   | 0.001   | ***          |
| S-113: AA 1 X | 1.381               | 0.485 | 2.848   | 0.004   | **           |
| S-182: AA 1 X | 2.543               | 0.573 | 4.442   | 0       | ***          |
| S-352: AA 1 X | 2.683               | 0.572 | 4.687   | 0       | ***          |
| S-100: AA 2 X | 2.354               | 0.544 | 4.33    | 0       | ***          |
| S-113: AA 2 X | 0.475               | 0.486 | 0.978   | 0.328   | ns           |
| S-182: AA 2 X | 2.387               | 0.572 | 4.172   | 0       | ***          |
| S-352: AA 2 X | 2.641               | 0.572 | 4.618   | 0       | ***          |
| S-100: AA 3 X | 2.533               | 0.544 | 4.655   | 0       | ***          |
| S-113: AA 3 X | 0.665               | 0.487 | 1.366   | 0.172   | ns           |
| S-182: AA 3 X | 2.898               | 0.572 | 5.064   | 0       | ***          |
| S-352: AA 3 X | 2.882               | 0.572 | 5.034   | 0       | ***          |

\*\*\*,  $P < 0.001$ ; \*\*,  $P < 0.01$ ; ns, not significant.

**Table S6.** Summary of the estimated parameters of the generalized linear model (GLM) of data from Table 11 [Effect of proliferation culture media (PCM) on somatic embryo maturation efficiency of sugi embryogenic cell lines (ECLs)].

| Variable       | Estimate parameters | SE    | Z value | P value | Significance |
|----------------|---------------------|-------|---------|---------|--------------|
| (Intercept)    | 6.028               | 0.165 | 36.482  | 0       | ***          |
| S-100          | -0.34               | 0.209 | -1.621  | 0.105   | ns           |
| T-1151         | 0.237               | 0.209 | 1.136   | 0.256   | ns           |
| T-158          | 0.048               | 0.209 | 0.23    | 0.818   | ns           |
| EM10-0         | -0.341              | 0.209 | -1.63   | 0.103   | ns           |
| EM3-1          | -0.115              | 0.209 | -0.551  | 0.582   | ns           |
| EM3-1m         | -0.35               | 0.21  | -1.672  | 0.095   | ns           |
| plate2         | -0.107              | 0.117 | -0.912  | 0.362   | ns           |
| plate3         | -0.072              | 0.117 | -0.619  | 0.536   | ns           |
| plate4         | -0.05               | 0.117 | -0.425  | 0.671   | ns           |
| plate5         | -0.183              | 0.117 | -1.559  | 0.119   | ns           |
| S-100: EM10-0  | 0.264               | 0.297 | 0.888   | 0.374   | ns           |
| T-1151: EM10-0 | 0.261               | 0.296 | 0.884   | 0.377   | ns           |
| T-158: EM10-0  | 0.054               | 0.296 | 0.183   | 0.855   | ns           |
| S-100:EM3-1    | 0.155               | 0.296 | 0.522   | 0.602   | ns           |
| T-1151:EM3-1   | 0.054               | 0.295 | 0.184   | 0.854   | ns           |
| T-158:EM3-1    | 0.109               | 0.296 | 0.368   | 0.713   | ns           |
| S-100:EM3-1m   | 0.195               | 0.297 | 0.659   | 0.51    | ns           |
| T-1151:EM3-1m  | 0.373               | 0.296 | 1.261   | 0.207   | ns           |
| T-158:EM3-1m   | 0.23                | 0.296 | 0.776   | 0.438   | ns           |

\*\*\*,  $P < 0.001$ ; ns, not significant.

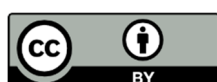

© 2021 by the authors. Submitted for possible open access publication under the terms and conditions of the Creative Commons Attribution (CC BY) license (<http://creativecommons.org/licenses/by/4.0/>).
